# Supplementary material for: In Vitro Comparative Study of Near-Infrared Photoimmunotherapy and Photodynamic Therapy
Source: MDPI journal article supplement (doi:10.3390/cancers15133400), 2023-06-28
Supplement: s1 [file s1]

*Type of the Paper (Article.)*

# **Supplementary Materials; In vitro comparative study of photoimmunotherapy and photodynamic therapy**

Susumu Yamashita, Miho Kojima, Nobuhiko Onda and Makoto Shibutani

**The Supporting Information includes:**

**Supporting Information Materials and Methods**

**Supporting Information Figure S1–5**

**Supporting Information Tables S1**

**Corresponding authors: Makoto Shibutani ([mshibuta@cc.tuat.ac.jp](mailto:mshibuta@cc.tuat.ac.jp))**

## **Supporting Information Materials and Methods**

### ***HMGB1 translocation assessment***

HMGB1 translocation was assessed by measuring the mean fluorescence intensity of nuclear HMGB1. The experiment was performed twice in duplicate samples. The assessment of HMGB1 immunofluorescence images was performed by Image J software. The images with at least 20 cells after excluding mitotic cells in each field-of-view were used. To set Region of interests (ROIs) of nuclei area, NucBlue staining images was used. Then, the ROIs were applied for HMGB1 immunofluorescence images in the same field-of-view as the NucBlue stained images. Statistical analysis was performed on the mean fluorescence intensity of nuclear HMGB1 from a total of five fields-of-view obtained. The representative images with ROIs are provided in Figure S4.

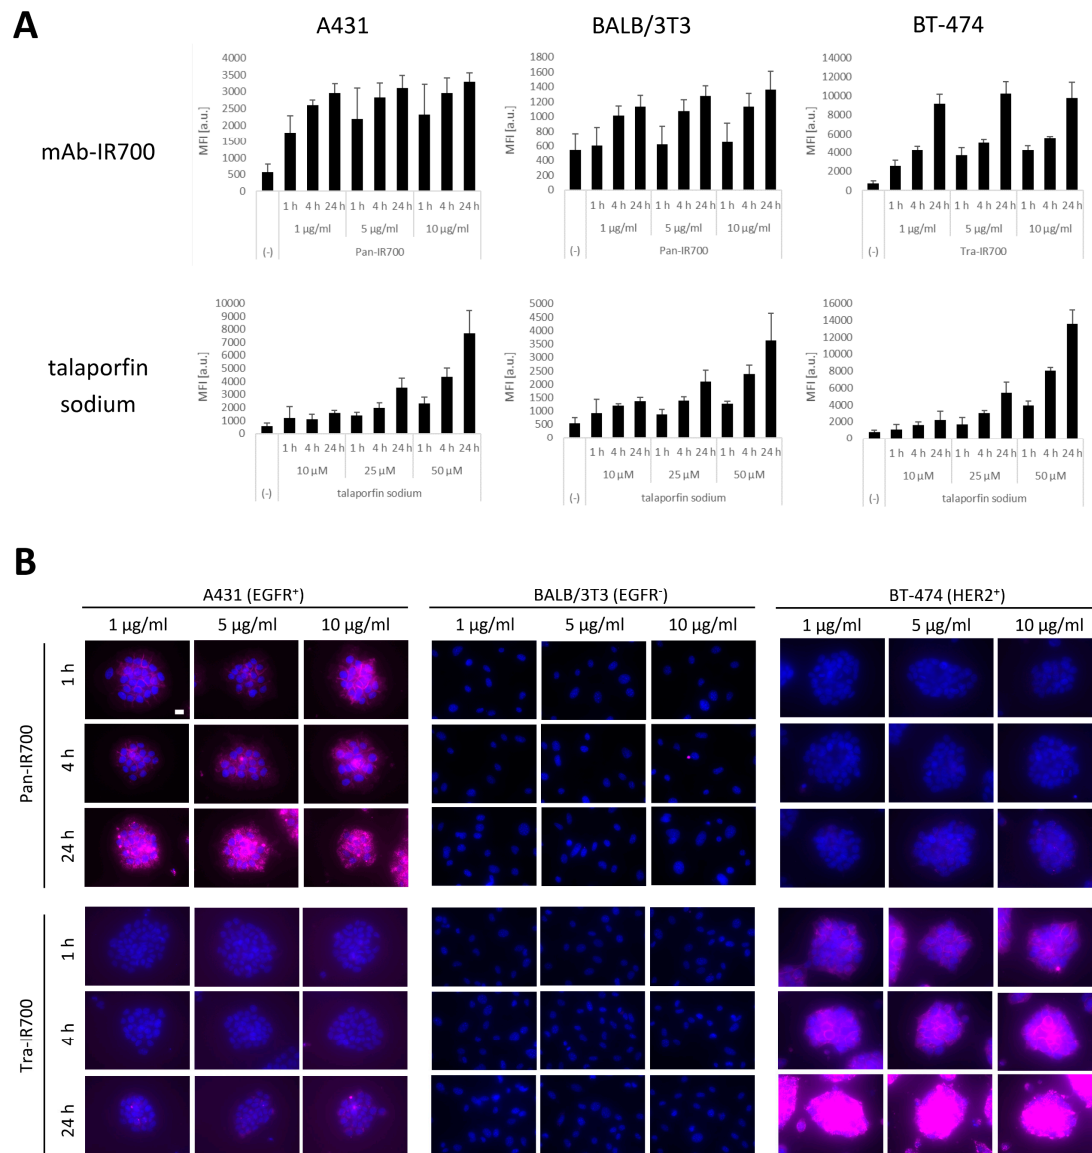

**Figure S1.** Binding/uptake specificity and cellular distribution. (A) Quantification of cellular binding/uptake of mAb-IR700 and talaporfin sodium. (B) Fluorescence images for two mAb-IR700 forms (targeting EGFR or HER2) in three cell lines. Live cells were stained for nuclei (blue) after incubation with mAb-IR700 or talaporfin sodium (magenta). Scale bar = 20  $\mu$ m.

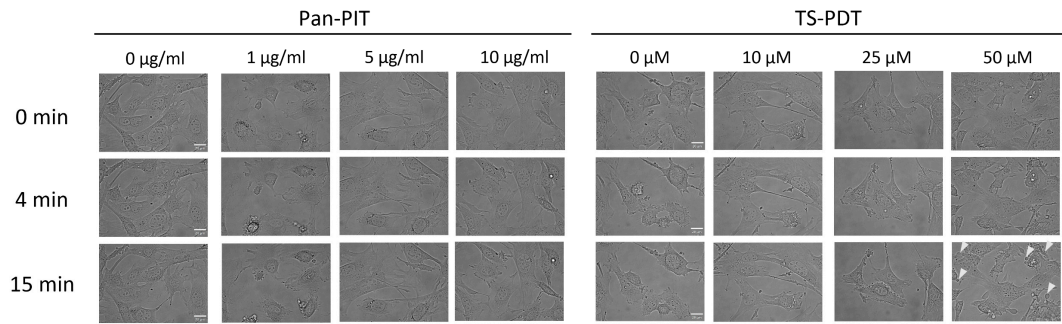

**Figure S2.** Time course images during irradiation in BALB/3T3 cells. Bright field images of BALB/3T3 cells. 0 min: before irradiation; 4 min: immediately after irradiation; 15 min: approximately 10 min after irradiation. White arrow indicates blebbing. Scale bar = 20  $\mu\text{m}$ .

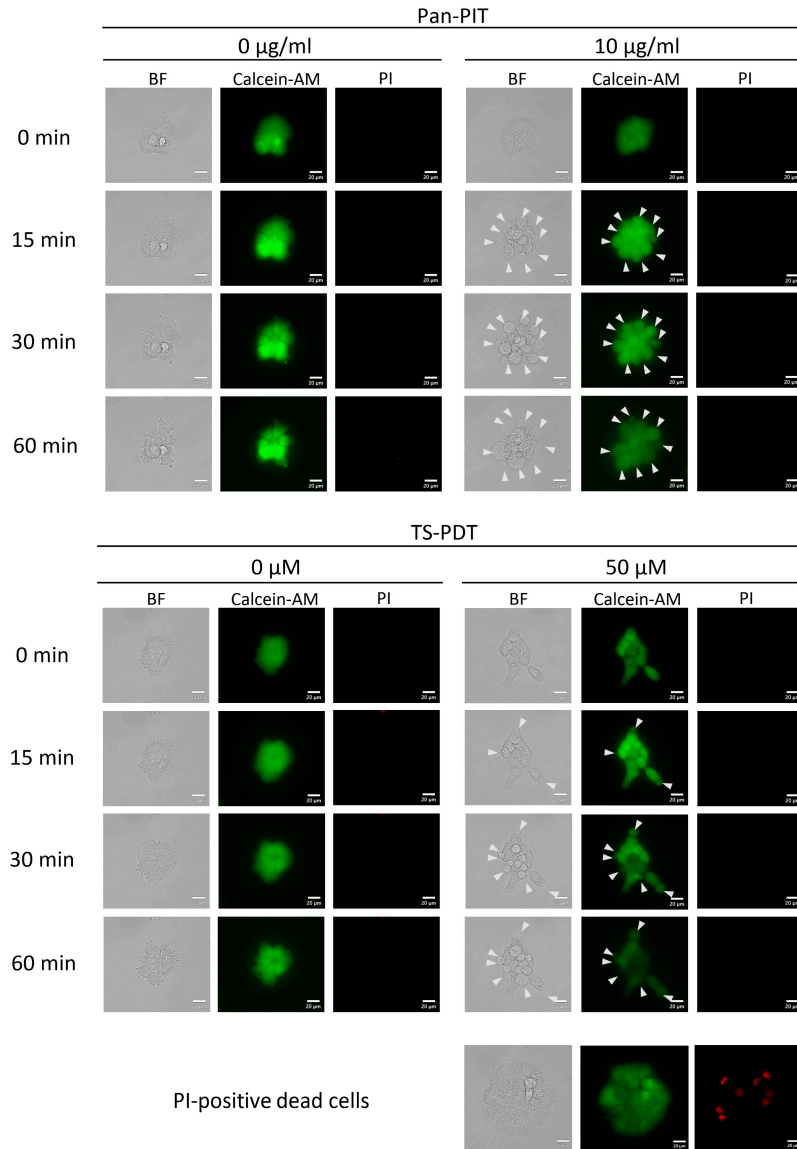

**Figure S3.** Calcein-AM/PI double-staining in A431 cells. At the highest dose of NIR-PIT or TS-PDT, calcein fluorescence decreased after 30 min, although PI fluorescence was undetected at all time points observed. The bottom panel shows images of PI-positive dead cells as a positive control of PI staining. White arrow indicates blebbing. Scale bar = 20  $\mu\text{m}$ .

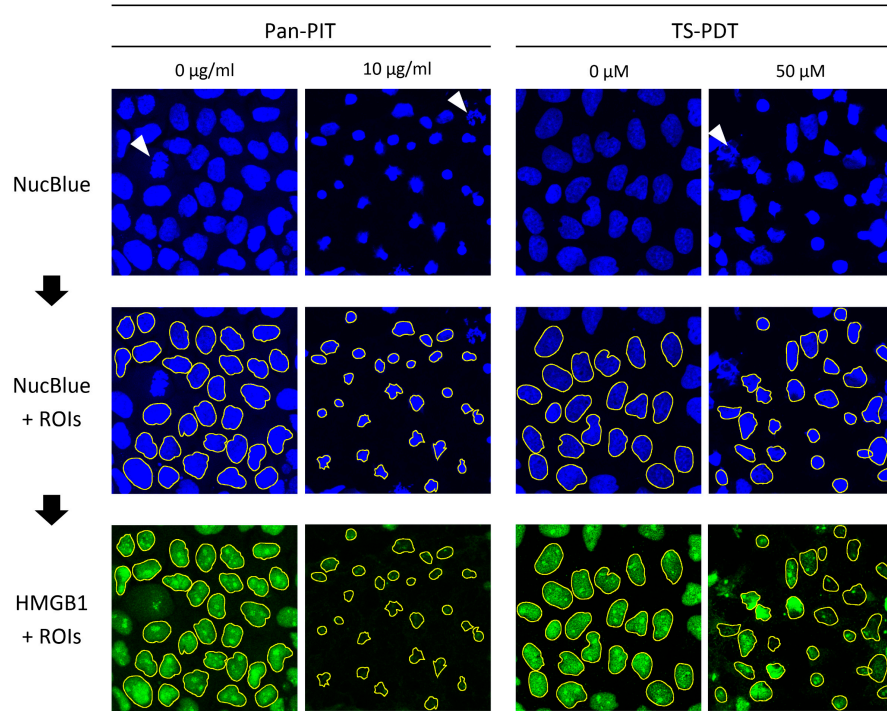

**Figure S4.** The procedure of ROIs setting and the representative images with ROIs in HMGB1 translocation assessment. Nuclei ROIs were set in NucBlue images. Then, the ROIs were applied to HMGB1 images. Nuclei that were not fully in the field-of-view and nuclei in mitotic phase (white arrow) were excluded from the assessment.

The diagram illustrates the labeling of a monoclonal antibody with IRDye700DX NHS ester. On the left, a schematic of a monoclonal antibody is shown with blue circles representing reactive sites. A dashed blue box highlights one of these sites, which is then shown in a detailed view on the right. This detailed view shows the chemical structure of the IRDye700DX NHS ester, which is a complex molecule featuring a phthalocyanine core, a long alkyl chain, and a reactive NHS ester group. The structure is labeled "IRDye700DX NHS ester".

**Monoclonal antibody**  
e.g., panitumumab, trastuzumab

**IRDye700DX NHS ester**

**talaporfin sodium**

**Figure S5.** The structure of agents used in the study. (A) mAb-IR700. (B) talaporfin sodium.

**Table S1.** Properties of NIR-PIT and TS-PDT in this study.

| Properties                                                             | NIR-PIT                                              | TS-PDT                                                         |
|------------------------------------------------------------------------|------------------------------------------------------|----------------------------------------------------------------|
| Cell specificity                                                       | Molecule-specific                                    | Non-selective cell type                                        |
| Efficacy of tumor cell visualization<br>(Lower limit of concentration) | $\geq 1 \mu\text{g/ml}$ ( $\approx 6.8 \text{ nM}$ ) | $\geq 25 \mu\text{M}$                                          |
| Efficacy of tumor cell death<br>(Lower limit of concentration)         | $\geq 6.8 \text{ nM}$                                | $\geq 25 \mu\text{M}$                                          |
| Pattern of cell death                                                  | Necrosis (6.8–68 nM)                                 | Apoptosis (25 $\mu\text{M}$ ),<br>Necrosis (50 $\mu\text{M}$ ) |
| Appearance of DAMPs                                                    | $\geq 6.8 \text{ nM}$                                | 50 $\mu\text{M}$                                               |
